# Supplementary material for: One-pot synthesis of supported sub-micron LaNi5 for hydrogen storage in a carbazole-type liquid organic hydrogen carrier
Source: Royal Society of Chemistry journal article supplement (doi:10.1039/d4cc05419a), 2024-12-03
Supplement: d4cc05419a1.pdf [file d4cc05419a1.pdf]

## Supporting Information

### Synthesis of the LaNi<sub>5</sub>/LaOCl

La-Ni-O oxide precursor is synthesized as described in the main text, 1.20 g precursor was mixed with 2.0 g LiCl-KCl (molar ratio 1:1) and 0.50 g CaH<sub>2</sub>, then heated at 700 °C for 2 h under Ar protection (flow rate 70 sccm). The calcined mixture was washed with 0.100 mol/L acetic acid under Ar protection, and the final products were obtained after centrifugation, washing, and vacuum drying.

### Supporting Figures

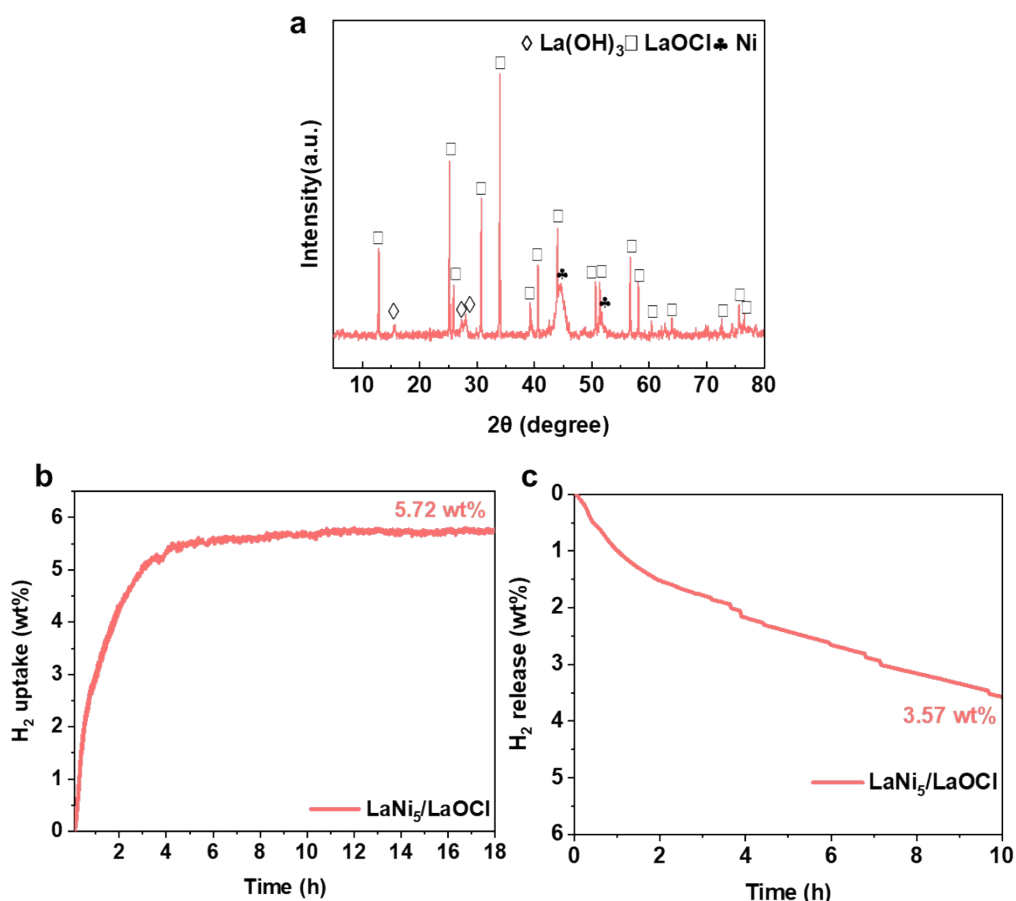

**Figure S1** (a) XRD of LaNi<sub>5</sub>/LaOCl, (b) NEC hydrogenation kinetics, and (c) 12H-NEC dehydrogenation kinetics under the catalysis of LaNi<sub>5</sub>/LaOCl

(Hydrogenation and dehydrogenation reactions are carried out at 180 °C, 7 MPa H<sub>2</sub>, and 200 °C, 0.1 MPa H<sub>2</sub> respectively, the catalyst loading is 10 wt%).

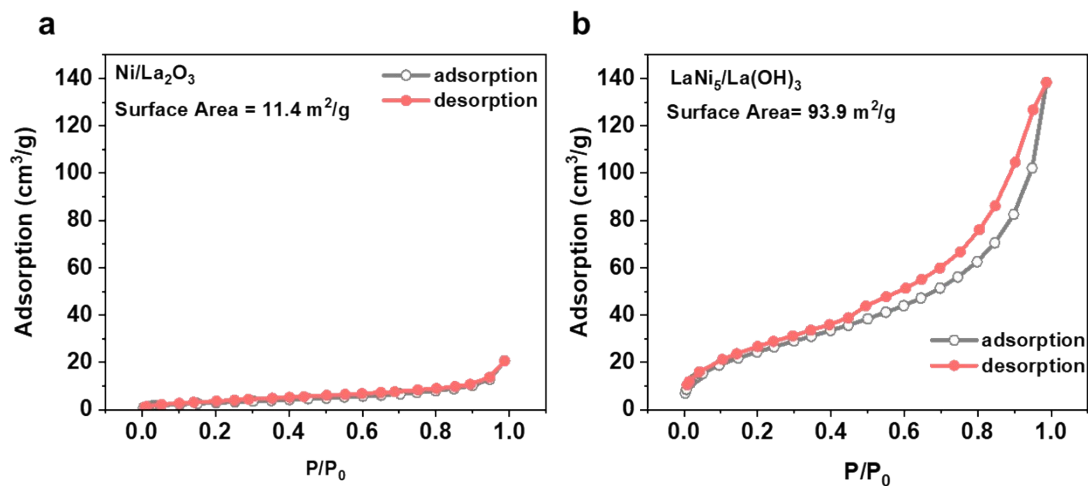

**Figure S2** N<sub>2</sub> adsorption and desorption isotherms of Ni/La<sub>2</sub>O<sub>3</sub> and LaNi<sub>5</sub>/La(OH)<sub>3</sub>.

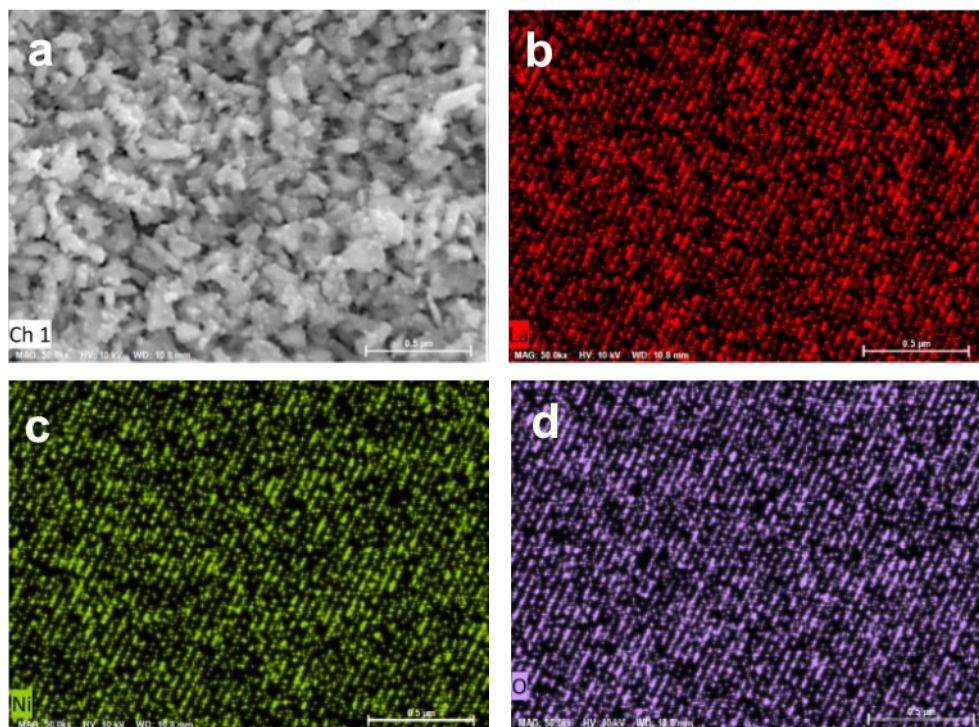

**Figure S3** EDS mapping under SEM of elements La, Ni, and O in Ni/La<sub>2</sub>O<sub>3</sub>

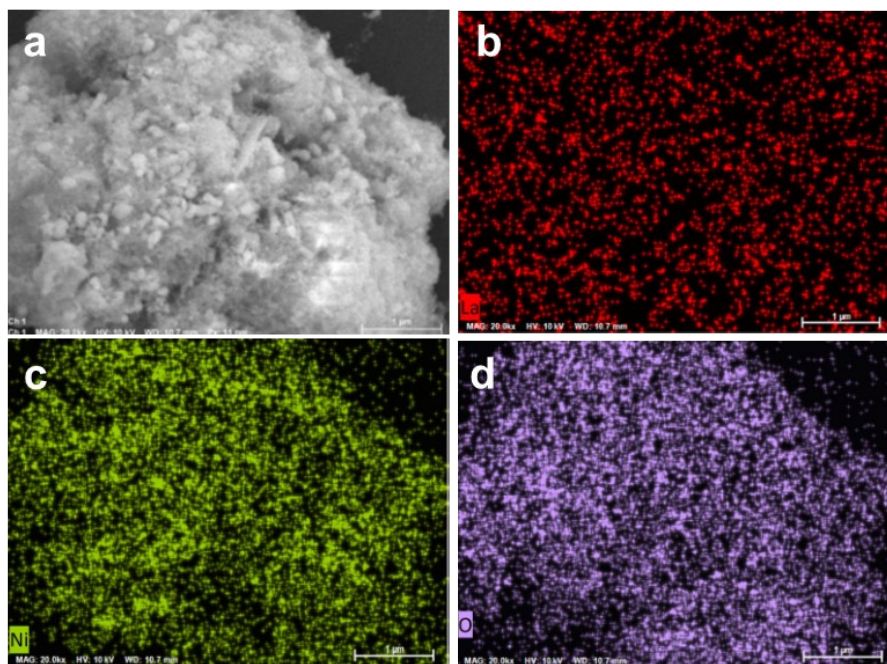

**Figure S4** EDS mapping under SEM of elements La, Ni, and O in  $\text{LaNi}_5/\text{La}(\text{OH})_3$

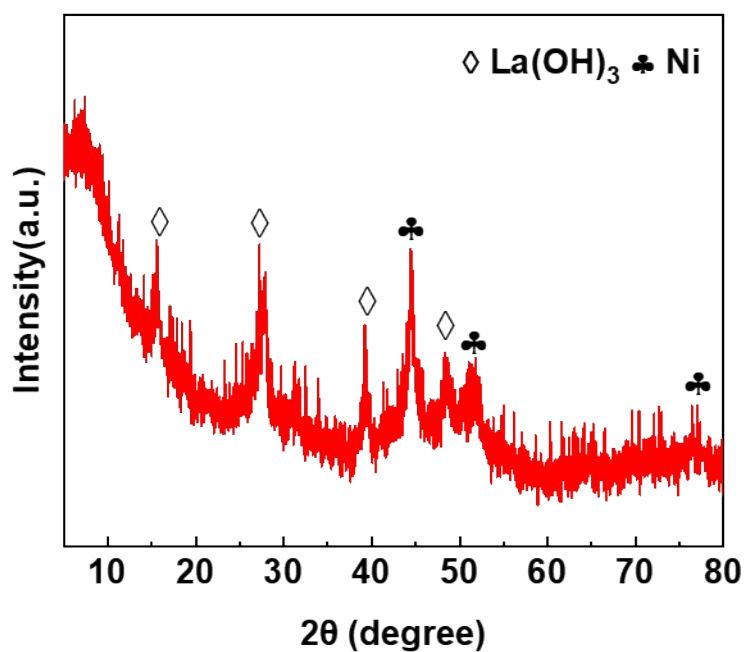

**Figure S5** XRD of  $\text{LaNi}_5/\text{La}(\text{OH})_3$  after 1 catalytical hydrogenation-dehydrogenation reaction cycle
